# Supplementary material for: EXpert consensus On Diaphragm UltraSonography in the critically ill (EXODUS): a Delphi consensus statement on the measurement of diaphragm ultrasound-derived parameters in a critical care setting
Source: Crit Care. 2022 Apr 8;26:99. doi: 10.1186/s13054-022-03975-5 (PMC8991486; doi:10.1186/s13054-022-03975-5)
Supplement: Supplementary file 3 — Additional file 3. Consensus round 2. [file 13054_2022_3975_MOESM3_ESM.xlsx]

## Sheet: Sheet1
Colour Code
	Consensus
	Question directed to gather arguments
	No consensus
	Question
Anatomy
1	On what do you base your opinion about the thickness throughout the zone of apposition? (e.g. experience, literature, etc. (please provide references if possible)
2	In our experience, differences in thickness throughout the zone of apposition are negligible. Assuming differences within a patient are present, do you think that they are large enough to be of clinical significance? (if you disagree and believe no differences are present please answer by (strongly)-disagree)
3	Do you think echogenicity of the muscle could potentially be a clinically relevant question (e.g. to assess fibrosis, oedema, etc) and merit further research?
4	A thickening fraction of less than 30% can be considered indicative of dysfunction during quiet breathing. Do you agree with this statement?
5	Why or why don’t you think that maximum effort measurements are clinically useful parameters. Please provide a brief (2-3 sentences) explanation and literature reference(s) if possible.
6	A diaphragm excursion of less than 2cm can be considered indicative of dysfunction during quiet breathing. Do you agree with this statement?
7	What are your arguments why defining a cut-off for hypertrophy is or is not possible. Please provide a brief explanation (2-3 sentences) of your opinion and literature reference(s) if possible.
8	>10% decrease from baseline thickness can be considered as cut-off for clinically relevant atrophy. Do you agree with this statement?
Transducer
1	The “Ideal” gain setting varies per hospital, machine and image obtained and there is no incorrect choice per se when assessing thickness as long as the diaphragm can be clearly delineated. Do you agree with this statement?
2	Gain should be used to create “ideal” contrast to clearly delineate the diaphragm from surrounding structures when assessing thickness. Do you agree with this statement?
3	Both the cardiac and abdominal transducer are suitable for excursion measurements. Do you agree with this statement?
4	The ideal depth for excursion measurements is patient dependent and should be chosen so that the maximum depth captures the maximal excursion of the diaphragm. Do you agree with this statement?
5	The optimal gain setting is image dependent and should be chosen so that the diaphragm is clearly visualized and discernible from adjacent structures, but dependent on the image obtained. Do you agree with this statement?
Technique
1	In which mode are thickness measurements best performed?
2	Please provide a brief explanation of the answer given, potentially with reference(s) if possible.
3	Both B-mode and M-mode are acceptable alternatives if the ultrasonographer has a strong preference for one. Do you agree with this statement?
4	The transducer should be placed on the midaxillary line or slightly more ventral, approximately between the 8th and 11th rib, with lung slightly or just not moving into the image. Do you agree with this statement?
5	To assess diaphragm muscle thickness, caliper placement should be done so that only muscle thickness is measured, i.e. as close as possible to the pleural and peritoneal line without including these lines in the measurement. Do you agree with this statement?
6	If you do not agree with the previous statement, could you please provide arguments for your choice (2-3 sentences) and literature reference if possible.
7	Unilateral measurement of the diaphragm on the right side of the patient is an acceptable proxy for the whole diaphragm, unless there is any suspicion of unilateral pathology (e.g. thoracic surgery, phrenic nerve or spinal cord injury) in which case this needs to be excluded or measurements need to be taken on both sides. Do you agree with this statement?
8	Do you think that differences in measuring RELAXED state as stated in the previous round (just after expiration, just before inspiration, when the diaphragm appears thinnest) impact the obtained measurements in a clinically relevant matter?
9	Based on which physiological process do you think this matters? Please provide your opinion/and or literature reference(s).
10	Do you think that differences in measuring CONTRACTED state as stated in the previous round (end inspiration, peak inspiration, when the diaphragm appears thickest) impact the obtained measurements in a clinically relevant matter?
11	Based on which physiological process do you think this matters? Please provide your opinion/and or literature reference(s).
12	Quiet breathing is the most suitable breathing pattern for making thickening measurements when assessing diaphragm function. Do you agree with this statement?
Ventilator
1	Does pressure support ventilation impact diaphragm thickness end expiration?
2	Does PEEP impact thickening of the diaphragm?
Learning and Expertise
1	To use diaphragm ultrasound (including diaphragm excursion and thickness) in clinical practice, a minimum of 40 (ideally bilateral) exams, of which at least 20 should be under (indirect) supervision of an experienced teacher. Is this an acceptable guideline ?
Clinical Practice
1	Is the ability to perform thickness measurements in order to assess thickening a basic ultrasonographic skill that should be required for any intensivist?
